# Supplementary material for: Piperidinium-based ionic liquid electrolyte with linear solvent and LiODFB for LiFePO4/Li cells at room and high temperature
Source: Royal Society of Chemistry journal article supplement (doi:10.1039/c7ra10045k), 2017-01-01
Supplement: c7ra10045k1.pdf [file c7ra10045k1.pdf]

## Supporting Information

### **Piperidinium-based ionic liquid electrolyte with linear solvent and LiODFB for LiFePO<sub>4</sub>/Li cells at room and high temperature**

Ximei Gao<sup>a,b</sup>, Guobin Zhu<sup>a</sup>, Tian Gao<sup>a</sup>, Feng Qian<sup>a</sup>, Qiang Shi<sup>a</sup>, Honghe Zheng<sup>a\*</sup>,  
Qunting Qu<sup>a\*</sup>

*a. College of Physics, Optoelectronics and Energy & Collaborative Innovation Center of Suzhou Nano Science and Technology, Soochow University, Suzhou, Jiangsu, 215006, P.R. China. hhzheng@suda.edu.cn, qtqu@suda.edu.cn*

*b. College of Science, Shanghai Institute of Technology, Shanghai, 201418, P. R. China.*

\*Corresponding author:

Tel: +86-512-69153523.

Fax:

E-mail: [hhzheng@suda.edu.cn](mailto:hhzheng@suda.edu.cn)

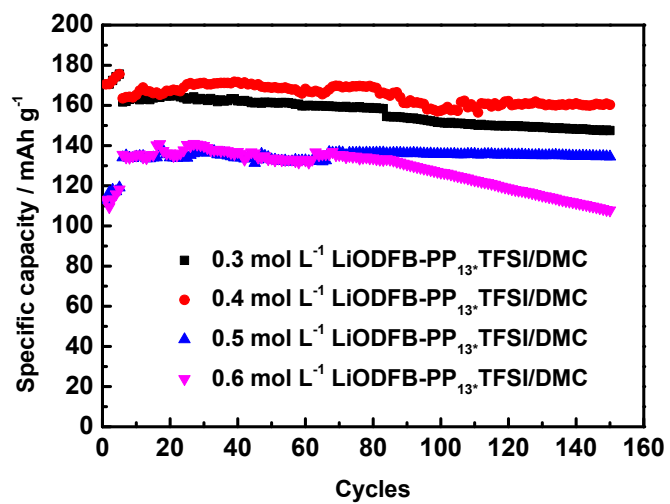

Figure S1. Comparison of long Charge-Discharge studies of LiFePO<sub>4</sub> electrodes with different concentration of LiODFB at room temperature.

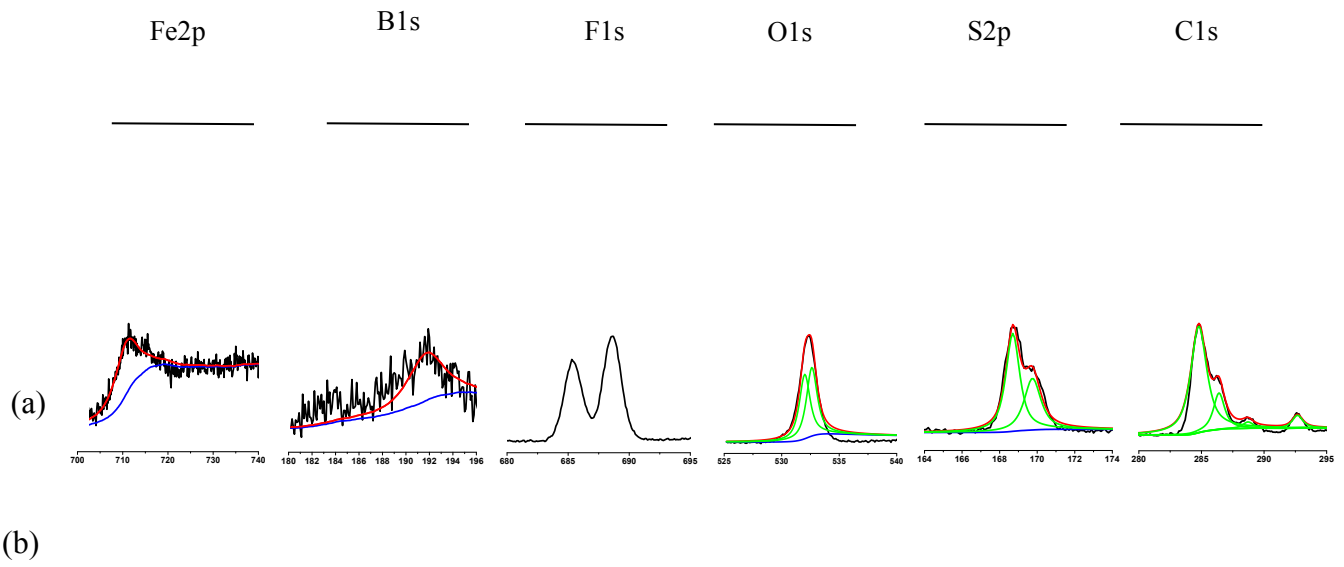

Figure S2. XPS patterns of cycled LiFePO<sub>4</sub> electrodes in the different electrolytes: (a) 0.1 mol L<sup>-1</sup> LiODFB-PP<sub>13</sub>\*TFSI and (b) 0.4 mol L<sup>-1</sup> LiODFB-PP<sub>13</sub>\*TFSI/DMC(8:2) at 60 °C.
